# Supplementary material
Source: PubMed Central journal article supplement (PMC3276288)
Supplement: supp_ddr472_ddr472supp.pdf [file supp_ddr472_ddr472supp.pdf]

**a** Microarray-based methylation assay

I. Digestion with Methyl Sensitive Restriction Enzymes (MSREs)

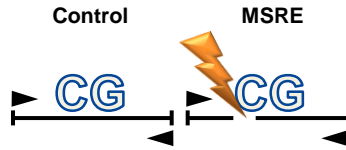

II. PCR amplification

Control: PCR product; MSRE: No product

III. Hybridization to microarrays

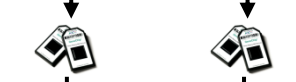

IV. Intensity outputs

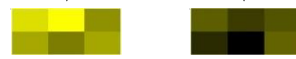

V. Scoring DNA methylation

Methylation signal =  $1 - \log_2(\text{before/after MSRE digestion})$

**b**

**Methyl Sensitive Restriction Enzymes (MSREs)**

| MSRE      | Recognition sequence |
|-----------|----------------------|
| Aci I     | CCGC                 |
| BsaH I    | GRCGYC               |
| Hha I     | GCGC                 |
| Hpa II    | CCGG                 |
| HpyCH4 IV | ACGT                 |

**c** Distributions of methylation levels (Unmethylated regions vs. genome)

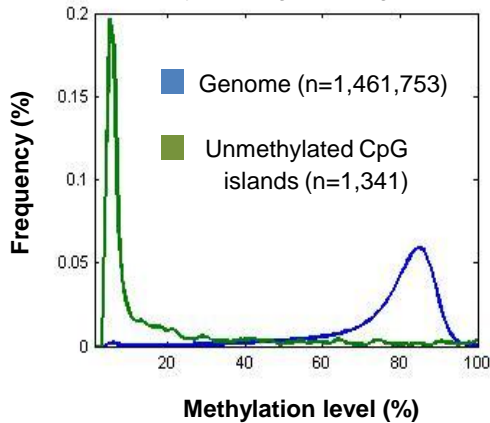

**d** Distributions of methylation levels (controls vs. T2DM patients)

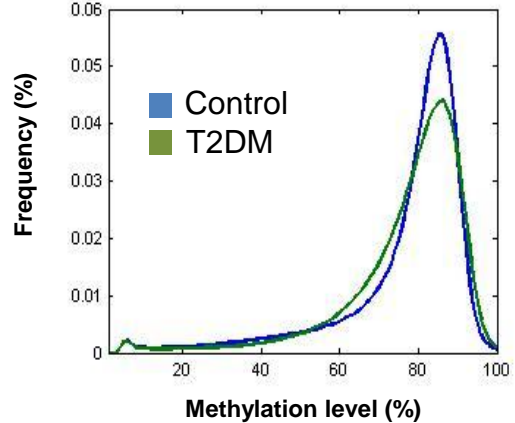

**e** Distributions of methylation levels (Young vs. old controls)

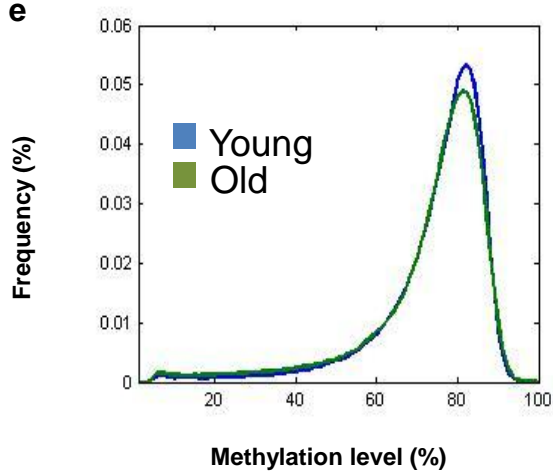

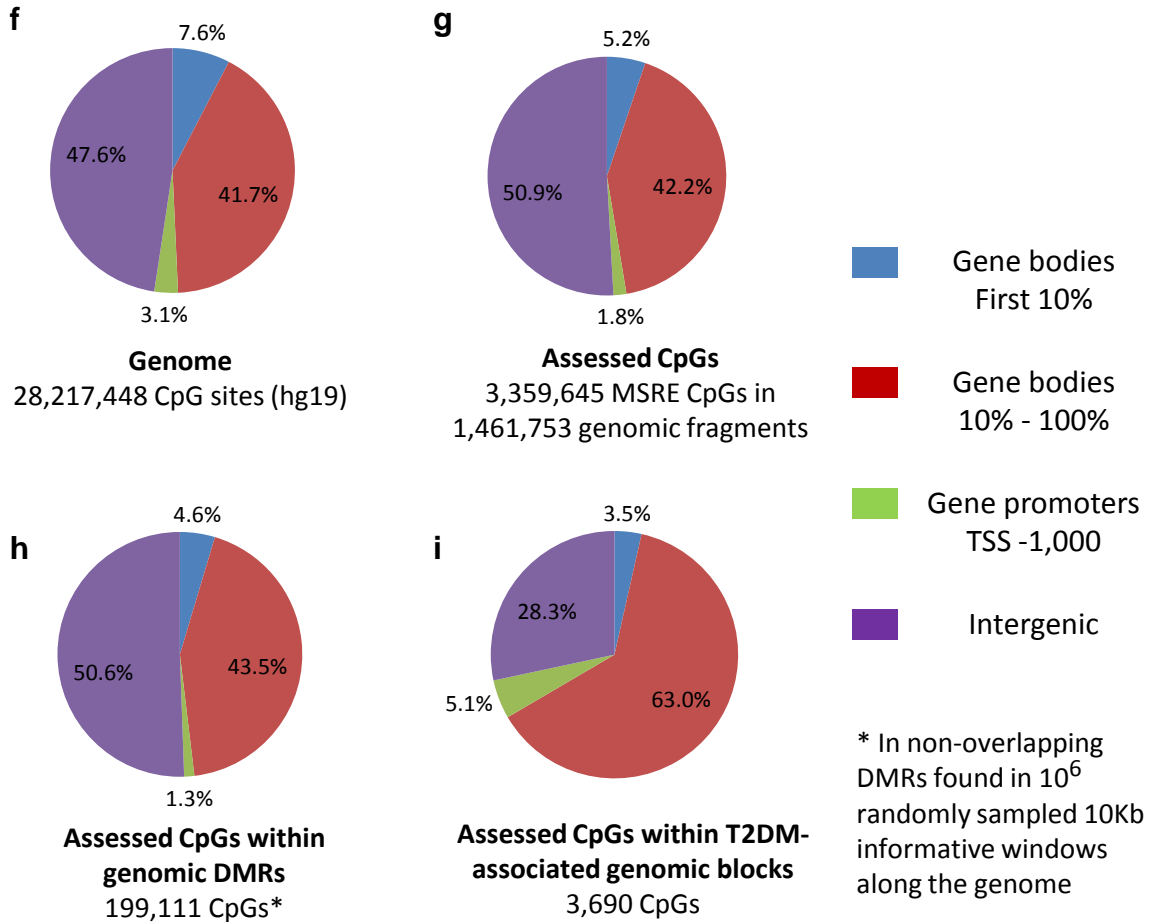

Figure S1. **Microarray-based methylation assessment.** **a.** A flow chart of the assay: genomic DNA samples were treated with a cocktail of five methyl sensitive restriction enzymes (MSREs), leading to digestion of unmethylated MSRE sites, while methylated sites remained intact (I). Treated and untreated DNAs were then PCR amplified from universal primers (arrowheads) (II), and the resulting 200-1,100bp genomic fragments containing the MSRE sites were labeled and hybridized to mapping microarrays (III). This procedure led to a smaller amount of PCR product and consequently to reduced hybridization intensities of fragments enclosing unmethylated MSRE sites, compared to that of untreated DNA. The relative hybridization intensities of six probe-sets are shown for a representative fragment (IV). The ratio between the hybridization intensities of untreated and MSRE-treated sites was then used to generate quantitative methylation signals (V), which may be transformed into methylation levels (%) based on experimental calibration curves. **b.** Target sequences of the MSREs included in the restriction endonucleases cocktail. **c.** Distribution of methylation levels at 1,461,753 informative genomic fragments probed on the Affymetrix 6.0 mapping microarray and of 1,341 genomic fragments of known unmethylated sites (1). **d.** Distribution of methylation levels (as in panel C) of case and control pools (average of 2 case and 2 control pools are shown). **e.** Distribution of methylation levels of young and old control pools. Data obtained using the Affymetrix SNP 6 (panels c and d) or the 250K (panel e) mapping array. **f-i:** the distribution of CpG sites among different fractions of the genome (color code), shown for all genomic CpGs (f), for the CpGs assessed by the microarray-based methylation assay (g), for the microarray-probed CpGs in case-control differentially methylated regions (h), and for the microarray-probed CpGs in T2DM-associated genomic blocks (i). The data show that the distribution of the microarray-probed CpGs is similar to the distribution of CpGs in the genome. Specifically, there is no bias towards the genomic fractions typical to the T2DM-associated blocks (i.e., gene-bodies) (i). Thus, the observed enrichment of DMRs in the T2D-associated blocks cannot be explained by an intrinsic bias of the differential methylation assay towards overrepresentation of these blocks.

Table S1. Methylation levels and case-control differences (absolute differences) of 93 CpGs embedded in T2DM-associated LD blocks. Total sequence reads are shown. Shaded lines indicate the methylation sites showing significant case-control differences ( $p < 0.05$ ,  $q < 0.05$ ).

| Chr. | Position  | Nearest gene | CTRL met. (%) | T2DM met. (%) | CTRL reads | T2DM reads | Met. Diff. | p-value | q-value |
|------|-----------|--------------|---------------|---------------|------------|------------|------------|---------|---------|
| 1    | 120312651 | NOTCH2       | 89.40         | 91.57         | 491        | 463        | 2.17       | 0.2540  | 0.2904  |
| 1    | 120312791 | NOTCH2       | 96.07         | 93.61         | 510        | 470        | 2.46       | 0.0805  | 0.1547  |
| 1    | 120328894 | NOTCH2       | 98.60         | 98.26         | 2581       | 3043       | 0.35       | 0.2979  | 0.3147  |
| 1    | 120328907 | NOTCH2       | 97.75         | 97.96         | 2586       | 3038       | 0.20       | 0.5981  | 0.4421  |
| 1    | 120328950 | NOTCH2       | 73.79         | 74.54         | 2587       | 3048       | 0.75       | 0.5198  | 0.4315  |
| 1    | 120329026 | NOTCH2       | 98.61         | 98.45         | 2582       | 3040       | 0.16       | 0.6278  | 0.4512  |
| 2    | 43590739  | THADA        | 87.64         | 88.43         | 3972       | 4000       | 0.79       | 0.2780  | 0.3108  |
| 2    | 43590864  | THADA        | 95.64         | 94.41         | 3947       | 3957       | 1.23       | 0.0120  | 0.0464  |
| 2    | 43591027  | THADA        | 95.05         | 94.87         | 3962       | 3979       | 0.18       | 0.7129  | 0.4590  |
| 2    | 43591331  | THADA        | 99.04         | 98.56         | 2615       | 2434       | 0.48       | 0.1128  | 0.1773  |
| 2    | 43591384  | THADA        | 98.68         | 99.13         | 2566       | 2405       | 0.45       | 0.1304  | 0.1929  |
| 3    | 64678670  | ADAMTS9      | 87.22         | 87.58         | 3585       | 3809       | 0.36       | 0.6402  | 0.4537  |
| 3    | 64678690  | ADAMTS9      | 93.50         | 94.45         | 3585       | 3803       | 0.95       | 0.0861  | 0.1547  |
| 3    | 64678726  | ADAMTS9      | 92.09         | 90.65         | 3590       | 3809       | 1.44       | 0.0282  | 0.0831  |
| 3    | 64678796  | ADAMTS9      | 24.81         | 25.23         | 3587       | 3804       | 0.42       | 0.6734  | 0.4590  |
| 3    | 64681160  | ADAMTS9      | 96.03         | 95.87         | 2900       | 3054       | 0.16       | 0.7549  | 0.4685  |
| 3    | 64681206  | ADAMTS9      | 92.44         | 93.09         | 2900       | 3055       | 0.65       | 0.3339  | 0.3360  |
| 3    | 64681258  | ADAMTS9      | 90.68         | 88.96         | 2865       | 2990       | 1.72       | 0.0297  | 0.0831  |
| 3    | 64685117  | ADAMTS9      | 79.79         | 79.78         | 2267       | 2701       | 0.01       | 0.9946  | 0.5397  |
| 3    | 64685407  | ADAMTS9      | 63.97         | 63.92         | 2232       | 2636       | 0.05       | 0.9699  | 0.5362  |
| 3    | 64686230  | ADAMTS9      | 92.07         | 90.92         | 3924       | 4118       | 1.16       | 0.0629  | 0.1361  |
| 3    | 64686345  | ADAMTS9      | 59.19         | 60.45         | 3926       | 4111       | 1.25       | 0.2519  | 0.2904  |
| 3    | 64687957  | ADAMTS9      | 79.73         | 79.37         | 2393       | 2885       | 0.36       | 0.7501  | 0.4685  |
| 3    | 64688103  | ADAMTS9      | 97.19         | 96.15         | 2388       | 2886       | 1.04       | 0.0374  | 0.0942  |
| 7    | 28141064  | JAZF1        | 98.69         | 98.83         | 3745       | 3682       | 0.14       | 0.5784  | 0.4343  |
| 7    | 28141095  | JAZF1        | 93.07         | 93.67         | 3741       | 3683       | 0.60       | 0.3003  | 0.3147  |
| 7    | 28143326  | JAZF1        | 94.19         | 93.70         | 4302       | 3556       | 0.49       | 0.3647  | 0.3505  |
| 7    | 28143410  | JAZF1        | 92.82         | 92.91         | 4307       | 3557       | 0.09       | 0.8726  | 0.5135  |
| 7    | 28143444  | JAZF1        | 98.40         | 97.75         | 4304       | 3559       | 0.65       | 0.0357  | 0.0942  |
| 7    | 28143482  | JAZF1        | 94.54         | 92.94         | 4305       | 3555       | 1.60       | 0.0034  | 0.0188  |
| 7    | 28143582  | JAZF1        | 96.97         | 96.61         | 4257       | 3539       | 0.36       | 0.3692  | 0.3505  |
| 7    | 28143733  | JAZF1        | 98.52         | 98.68         | 3919       | 4684       | 0.16       | 0.5332  | 0.4327  |
| 7    | 28143765  | JAZF1        | 98.13         | 98.53         | 3916       | 4698       | 0.40       | 0.1518  | 0.2009  |
| 7    | 28143827  | JAZF1        | 95.89         | 95.70         | 3919       | 4676       | 0.19       | 0.6554  | 0.4580  |
| 7    | 28143893  | JAZF1        | 96.12         | 96.14         | 3919       | 4692       | 0.02       | 0.9537  | 0.5362  |
| 7    | 28143956  | JAZF1        | 96.96         | 96.31         | 3918       | 4698       | 0.65       | 0.0986  | 0.1653  |
| 8    | 118247781 | SLC30A8      | 85.12         | 84.83         | 4188       | 4040       | 0.30       | 0.7062  | 0.4590  |
| 8    | 118247902 | SLC30A8      | 62.38         | 60.25         | 4136       | 4010       | 2.13       | 0.0483  | 0.1157  |
| 8    | 118257326 | SLC30A8      | 85.61         | 83.43         | 5159       | 4888       | 2.18       | 0.0025  | 0.0188  |
| 8    | 118257358 | SLC30A8      | 96.12         | 95.07         | 5130       | 4845       | 1.05       | 0.0102  | 0.0428  |
| 8    | 118257529 | SLC30A8      | 76.73         | 77.79         | 2544       | 2576       | 1.07       | 0.3627  | 0.3505  |
| 8    | 118257972 | SLC30A8      | 89.30         | 87.42         | 2496       | 3346       | 1.88       | 0.0274  | 0.0831  |
| 8    | 118257978 | SLC30A8      | 91.86         | 91.97         | 2494       | 3326       | 0.11       | 0.8777  | 0.5135  |
| 8    | 118258012 | SLC30A8      | 88.91         | 88.72         | 2497       | 3343       | 0.19       | 0.8215  | 0.4980  |
| 8    | 118258048 | SLC30A8      | 78.44         | 79.27         | 2496       | 3343       | 0.83       | 0.4442  | 0.3921  |
| 8    | 118258573 | SLC30A8      | 61.78         | 65.43         | 3370       | 2930       | 3.65       | 0.0027  | 0.0188  |

Table S1. ...end.

| Chr. | Position  | Nearest gene | CTRL met. (%) | T2DM met. (%) | CTRL reads | T2DM reads | Met. Diff. | p-value | q-value |
|------|-----------|--------------|---------------|---------------|------------|------------|------------|---------|---------|
| 10   | 94452858  | HHEX         | 34.27         | 33.86         | 3011       | 1946       | 0.41       | 0.7635  | 0.4685  |
| 10   | 94452884  | HHEX         | 76.38         | 75.62         | 3002       | 1907       | 0.76       | 0.5426  | 0.4334  |
| 10   | 114734658 | TCF7L2       | 88.76         | 86.41         | 4618       | 3755       | 2.34       | 0.0012  | 0.0116  |
| 10   | 114734680 | TCF7L2       | 97.21         | 96.68         | 4699       | 3829       | 0.53       | 0.1560  | 0.2012  |
| 10   | 114734701 | TCF7L2       | 93.38         | 93.69         | 4700       | 3832       | 0.30       | 0.5718  | 0.4343  |
| 10   | 114734730 | TCF7L2       | 96.82         | 96.22         | 4681       | 3816       | 0.60       | 0.1349  | 0.1939  |
| 10   | 114734749 | TCF7L2       | 96.85         | 96.37         | 4667       | 3797       | 0.48       | 0.2201  | 0.2701  |
| 10   | 114734797 | TCF7L2       | 91.90         | 92.62         | 4653       | 3807       | 0.72       | 0.2186  | 0.2701  |
| 10   | 114734825 | TCF7L2       | 98.46         | 98.36         | 4690       | 3832       | 0.11       | 0.6975  | 0.4590  |
| 10   | 114738733 | TCF7L2       | 96.47         | 96.23         | 3714       | 4885       | 0.24       | 0.5627  | 0.4343  |
| 10   | 114738765 | TCF7L2       | 89.30         | 88.70         | 3719       | 4883       | 0.60       | 0.3801  | 0.3541  |
| 10   | 114738784 | TCF7L2       | 97.63         | 98.13         | 3720       | 4883       | 0.50       | 0.1053  | 0.1710  |
| 10   | 114738858 | TCF7L2       | 88.97         | 88.56         | 3718       | 4879       | 0.41       | 0.5541  | 0.4343  |
| 10   | 114738859 | TCF7L2       | 86.13         | 86.19         | 2782       | 3969       | 0.06       | 0.9406  | 0.5362  |
| 10   | 114739026 | TCF7L2       | 51.10         | 51.56         | 2775       | 3966       | 0.46       | 0.7077  | 0.4590  |
| 10   | 114739045 | TCF7L2       | 50.84         | 52.97         | 2769       | 3957       | 2.13       | 0.0856  | 0.1547  |
| 10   | 114739311 | TCF7L2       | 98.55         | 98.19         | 4633       | 1762       | 0.36       | 0.2912  | 0.3147  |
| 10   | 114739401 | TCF7L2       | 99.25         | 98.53         | 4642       | 1768       | 0.72       | 0.0079  | 0.0361  |
| 10   | 114739403 | TCF7L2       | 98.51         | 98.47         | 4645       | 1766       | 0.04       | 0.8977  | 0.5191  |
| 10   | 114743533 | TCF7L2       | 95.47         | 95.76         | 3554       | 4788       | 0.29       | 0.5205  | 0.4315  |
| 10   | 114743543 | TCF7L2       | 99.04         | 98.80         | 3536       | 4774       | 0.23       | 0.3184  | 0.3270  |
| 10   | 114743576 | TCF7L2       | 97.74         | 97.74         | 3545       | 4783       | 0.00       | 0.9977  | 0.5397  |
| 10   | 114743580 | TCF7L2       | 95.94         | 96.65         | 3545       | 4781       | 0.72       | 0.0846  | 0.1547  |
| 10   | 114743601 | TCF7L2       | 94.52         | 92.59         | 3542       | 4777       | 1.93       | 0.0004  | 0.0055  |
| 10   | 114743664 | TCF7L2       | 98.23         | 96.91         | 3551       | 4788       | 1.32       | 0.0001  | 0.0025  |
| 10   | 114743672 | TCF7L2       | 98.68         | 98.16         | 3549       | 4787       | 0.52       | 0.0649  | 0.1361  |
| 10   | 114743783 | TCF7L2       | 96.50         | 96.20         | 3314       | 3054       | 0.30       | 0.5231  | 0.4315  |
| 11   | 2805556   | KCNQ1        | 36.49         | 34.51         | 3582       | 4795       | 1.98       | 0.0613  | 0.1361  |
| 11   | 2805588   | KCNQ1        | 13.05         | 12.79         | 3585       | 4807       | 0.26       | 0.7207  | 0.4590  |
| 11   | 2805636   | KCNQ1        | 20.12         | 18.19         | 3583       | 4792       | 1.92       | 0.0264  | 0.0831  |
| 11   | 2805655   | KCNQ1        | 24.07         | 24.26         | 3580       | 4794       | 0.18       | 0.8468  | 0.5072  |
| 11   | 2805669   | KCNQ1        | 14.86         | 14.46         | 3592       | 4806       | 0.40       | 0.6063  | 0.4421  |
| 11   | 2805692   | KCNQ1        | 15.32         | 15.63         | 3584       | 4797       | 0.32       | 0.6910  | 0.4590  |
| 11   | 2805738   | KCNQ1        | 23.21         | 24.60         | 3576       | 4797       | 1.39       | 0.1402  | 0.1959  |
| 11   | 2805785   | KCNQ1        | 70.80         | 72.23         | 3590       | 4808       | 1.43       | 0.1507  | 0.2009  |
| 11   | 2805916   | KCNQ1        | 90.23         | 92.20         | 2979       | 4180       | 1.97       | 0.0033  | 0.0188  |
| 11   | 2805938   | KCNQ1        | 75.01         | 74.27         | 2981       | 4190       | 0.74       | 0.4808  | 0.4171  |
| 11   | 2806049   | KCNQ1        | 88.06         | 90.97         | 2981       | 4187       | 2.92       | 0.0001  | 0.0015  |
| 11   | 2806079   | KCNQ1        | 93.43         | 95.03         | 2968       | 4168       | 1.60       | 0.0038  | 0.0192  |
| 11   | 2806117   | KCNQ1        | 60.26         | 61.16         | 2977       | 4184       | 0.90       | 0.4418  | 0.3921  |
| 11   | 17362226  | KCNJ11       | 1.36          | 1.12          | 9547       | 9751       | 0.24       | 0.1286  | 0.1929  |
| 12   | 69942890  | TSPAN8       | 89.92         | 88.86         | 4375       | 4774       | 1.07       | 0.0986  | 0.1653  |
| 12   | 69943012  | TSPAN8       | 85.53         | 83.74         | 4367       | 4761       | 1.79       | 0.0182  | 0.0654  |
| 12   | 69943050  | TSPAN8       | 89.41         | 89.44         | 4373       | 4762       | 0.03       | 0.9647  | 0.5362  |
| 12   | 69952996  | TSPAN8/LG R5 | 80.78         | 77.88         | 328        | 2934       | 2.90       | 0.2273  | 0.2723  |
| 16   | 52366732  | FTO          | 30.15         | 27.53         | 12180      | 11013      | 2.61       | 1E-05   | 0.0006  |
| 16   | 52366887  | FTO          | 96.61         | 96.88         | 5844       | 5522       | 0.27       | 0.4163  | 0.3808  |

Table S2. Case-control methylation differences at clusters of neighboring CpG sites. Size and positions (hg18) of sequenced fragments, the number of CpG sites in each fragment, nearest gene name, total sequence reads, and case-control difference in the fraction of reads showing complete methylation (all CpG are fully methylated) out of all reads are shown. Shaded lines indicate the clusters showing significant case-control differences ( $p < 0.05$ ,  $q < 0.05$ ).

| Chr. | Start     | End       | CpGs (n) | Nearest gene | CTRL reads | T2DM reads | Full met. CTRL (%) | Full met. T2DM (%) | Diff. | p-value  | q-value |
|------|-----------|-----------|----------|--------------|------------|------------|--------------------|--------------------|-------|----------|---------|
| 1    | 120312604 | 120312792 | 2        | NOTCH2       | 513        | 471        | 86.35              | 85.56              | 0.79  | 0.7207   | 0.6322  |
| 1    | 120328875 | 120329027 | 4        | NOTCH2       | 2589       | 3049       | 70.30              | 71.30              | 1.00  | 0.4094   | 0.4621  |
| 2    | 43591303  | 43591439  | 2        | THADA        | 2633       | 2443       | 97.76              | 97.70              | 0.05  | 0.9016   | 0.6322  |
| 3    | 64678648  | 64678822  | 4        | ADAMTS9      | 3592       | 3813       | 20.10              | 20.25              | 0.14  | 0.8773   | 0.6322  |
| 3    | 64681139  | 64681259  | 3        | ADAMTS9      | 2902       | 3058       | 81.19              | 80.64              | 0.54  | 0.5943   | 0.5919  |
| 3    | 64685113  | 64685434  | 2        | ADAMTS9      | 2269       | 2706       | 53.99              | 53.58              | 0.41  | 0.7748   | 0.6322  |
| 3    | 64687953  | 64688132  | 2        | ADAMTS9      | 2396       | 2887       | 77.71              | 76.34              | 1.37  | 0.2390   | 0.3678  |
| 7    | 28141049  | 28141097  | 2        | JAZF1        | 3748       | 3688       | 91.95              | 92.60              | 0.65  | 0.2940   | 0.3829  |
| 7    | 28143298  | 28143593  | 5        | JAZF1        | 4308       | 3561       | 82.84              | 82.76              | 0.09  | 0.9176   | 0.6322  |
| 8    | 118247780 | 118247919 | 2        | SLC30A8      | 4205       | 4048       | 56.81              | 53.88              | 2.93  | 0.0074   | 0.0250  |
| 8    | 118257203 | 118257365 | 2        | SLC30A8      | 5168       | 4895       | 83.39              | 80.75              | 2.64  | 0.0006   | 0.0047  |
| 8    | 118257477 | 118257689 | 4        | SLC30A8      | 2500       | 3350       | 63.96              | 63.40              | 0.55  | 0.6628   | 0.6234  |
| 10   | 118257950 | 118258121 | 2        | HHEX         | 3054       | 1964       | 31.43              | 28.92              | 2.51  | 0.0592   | 0.1113  |
| 10   | 118258486 | 118258613 | 7        | TCF7L2       | 4704       | 3835       | 70.35              | 69.62              | 0.72  | 0.4672   | 0.4944  |
| 10   | 94452758  | 94452957  | 4        | TCF7L2       | 3721       | 4888       | 76.43              | 76.51              | 0.08  | 0.9273   | 0.6322  |
| 10   | 114734572 | 114734828 | 3        | TCF7L2       | 4651       | 1769       | 96.49              | 95.25              | 1.24  | 0.0207   | 0.0583  |
| 10   | 114738727 | 114738864 | 3        | TCF7L2       | 2782       | 3971       | 33.03              | 34.30              | 1.27  | 0.2779   | 0.3829  |
| 10   | 114743495 | 114743680 | 7        | TCF7L2       | 3558       | 4795       | 83.62              | 81.04              | 2.57  | 0.0024   | 0.0115  |
| 11   | 114739303 | 114739430 | 5        | KCNQ1        | 2984       | 4193       | 36.93              | 39.18              | 2.25  | 0.0528   | 0.1113  |
| 11   | 114743495 | 114743680 | 8        | KCNQ1        | 3596       | 4819       | 1.70               | 1.72               | 0.02  | 0.9336   | 0.6322  |
| 12   | 2805534   | 2805789   | 3        | TSPAN8       | 4384       | 4780       | 71.03              | 69.12              | 1.91  | 0.0464   | 0.1113  |
| 16   | 52366689  | 52366689  | 2        | FTO          | 12180      | 11013      | 29.84              | 27.28              | 2.55  | 1.71E-05 | 0.0003  |

Table S3. Methylation levels of the control individuals presented in figure 4.

| #  | Meth. (%) | Gender | Age | BMI   | #   | Meth. (%) | Gender | Age | BMI   | #   | Meth. (%) | Gender | Age | BMI   |
|----|-----------|--------|-----|-------|-----|-----------|--------|-----|-------|-----|-----------|--------|-----|-------|
| 1  | 35.75     | Male   | 40  | 32.72 | 80  | 41.67     | Female | 58  | 24.88 | 159 | 35.37     | Female | 63  | 24.70 |
| 2  | 30.14     | Male   | 41  | 16.51 | 81  | 38.64     | Female | 58  | 30.20 | 160 | 34.88     | Female | 63  | 24.36 |
| 3  | 22.39     | Male   | 41  | 31.62 | 82  | 24.44     | Male   | 59  | 23.80 | 161 | 38.7      | Female | 63  | 35.52 |
| 4  | 33.44     | Male   | 43  | 33.46 | 83  | 18.71     | Male   | 59  | NA    | 162 | 18.94     | Female | 63  | 32.99 |
| 5  | 40.09     | Female | 43  | 22.68 | 84  | 33.71     | Male   | 59  | NA    | 163 | 28.28     | Female | 63  | 35.28 |
| 6  | 32.52     | Male   | 44  | 35.43 | 85  | 40.74     | Male   | 59  | NA    | 164 | 27.59     | Male   | 64  | NA    |
| 7  | 28.81     | Female | 44  | 30.84 | 86  | 31.15     | Female | 59  | 21.69 | 165 | 25.54     | Male   | 64  | NA    |
| 8  | 30.59     | Male   | 45  | 28.31 | 87  | 39.91     | Female | 59  | 27.25 | 166 | 30.69     | Male   | 64  | NA    |
| 9  | 47.07     | Female | 45  | 21.17 | 88  | 29.53     | Female | 59  | 27.40 | 167 | 44.61     | Male   | 64  | NA    |
| 10 | 18.42     | Female | 45  | 32.39 | 89  | 39.24     | Female | 59  | 36.63 | 168 | 26.87     | Male   | 64  | NA    |
| 11 | 31.52     | Male   | 46  | 32.05 | 90  | 35.73     | Female | 59  | 34.63 | 169 | 32.87     | Female | 64  | 25.43 |
| 12 | 46.41     | Female | 46  | 34.29 | 91  | 25.25     | Female | 59  | 31.89 | 170 | 29.05     | Female | 64  | 32.66 |
| 13 | 44.67     | Female | 47  | 23.31 | 92  | 34.99     | Female | 59  | 31.20 | 171 | 32.04     | Female | 64  | 55.84 |
| 14 | 39.14     | Female | 47  | 33.27 | 93  | 15.89     | Female | 59  | 24.80 | 172 | 41.84     | Female | 64  | 27.32 |
| 15 | 45.17     | Male   | 48  | 22.49 | 94  | 28.81     | Female | 59  | 23.58 | 173 | 41.33     | Female | 64  | 43.69 |
| 16 | 25.72     | Male   | 48  | 28.25 | 95  | 12.71     | Female | 59  | 39.92 | 174 | 24.01     | Female | 64  | 38.44 |
| 17 | 36.61     | Male   | 49  | 28.06 | 96  | 33.07     | Female | 59  | 23.70 | 175 | 13.77     | Female | 64  | 23.44 |
| 18 | 33.28     | Male   | 49  | NA    | 97  | 34.09     | Female | 59  | 32.76 | 176 | 21.88     | Male   | 65  | 27.51 |
| 19 | 35.22     | Female | 49  | 20.38 | 98  | 31.39     | Male   | 59  | 23.53 | 177 | 23.37     | Male   | 65  | NA    |
| 20 | 28.69     | Male   | 50  | 29.05 | 99  | 26.82     | Female | 59  | 23.44 | 178 | 43.07     | Male   | 65  | NA    |
| 21 | 40.83     | Male   | 50  | 29.71 | 100 | 24.65     | Female | 59  | 28.04 | 179 | 23.68     | Male   | 65  | NA    |
| 22 | 37.02     | Female | 50  | 30.48 | 101 | 36.92     | Female | 60  | 31.64 | 180 | 27.83     | Male   | 65  | NA    |
| 23 | 37.33     | Female | 50  | 32.22 | 102 | 33.26     | Male   | 60  | NA    | 181 | 29        | Male   | 65  | NA    |
| 24 | 33.42     | Male   | 51  | 26.51 | 103 | 29.09     | Male   | 60  | 27.08 | 182 | 34.82     | Male   | 65  | 24.80 |
| 25 | 33.31     | Female | 51  | 26.04 | 104 | 47.41     | Female | 60  | 25.40 | 183 | 34.91     | Male   | 65  | 24.77 |
| 26 | 34.95     | Female | 51  | 22.01 | 105 | 38.93     | Female | 60  | 35.72 | 184 | 39.84     | Female | 65  | 27.91 |
| 27 | 38.5      | Female | 51  | 33.82 | 106 | 45.46     | Female | 60  | 30.57 | 185 | 33.36     | Female | 65  | 33.04 |
| 28 | 25.97     | Male   | 52  | NA    | 107 | 47.25     | Female | 60  | 28.54 | 186 | 24.48     | Female | 65  | 30.64 |
| 29 | 31.28     | Female | 52  | 35.28 | 108 | 32.25     | Female | 60  | 32.80 | 187 | 28.31     | Female | 65  | 28.65 |
| 30 | 24.63     | Female | 52  | 33.77 | 109 | 38.83     | Female | 60  | 32.30 | 188 | 27.49     | Male   | 65  | 37.22 |
| 31 | 29.18     | Male   | 53  | 26.57 | 110 | 29.32     | Female | 60  | 29.63 | 189 | 13.38     | Male   | 66  | NA    |
| 32 | 40.81     | Male   | 53  | 29.71 | 111 | 35.83     | Male   | 61  | NA    | 190 | 30.42     | Male   | 66  | NA    |
| 33 | 28.05     | Female | 53  | 37.75 | 112 | 20.55     | Male   | 61  | NA    | 191 | 27.33     | Male   | 66  | NA    |
| 34 | 36.15     | Female | 54  | 22.04 | 113 | 42.24     | Male   | 61  | NA    | 192 | 27.83     | Male   | 66  | NA    |
| 35 | 19.62     | Female | 54  | 32.04 | 114 | 25.68     | Male   | 61  | NA    | 193 | 34.25     | Male   | 66  | NA    |
| 36 | 44.09     | Female | 54  | 23.39 | 115 | 25.74     | Male   | 61  | NA    | 194 | 37.74     | Female | 66  | 27.91 |
| 37 | 25.47     | Female | 54  | 32.86 | 116 | 36        | Male   | 61  | NA    | 195 | 35.47     | Female | 66  | 36.64 |
| 38 | 23.69     | Female | 54  | 33.66 | 117 | 43.85     | Male   | 61  | NA    | 196 | 46.41     | Female | 66  | 21.82 |
| 39 | 32.95     | Female | 54  | 37.85 | 118 | 40.84     | Male   | 61  | NA    | 197 | 47.22     | Female | 66  | 36.56 |
| 40 | 31.11     | Female | 55  | 21.48 | 119 | 24.91     | Male   | 61  | NA    | 198 | 25.18     | Female | 66  | 29.30 |
| 41 | 17.08     | Female | 55  | 24.36 | 120 | 37.27     | Male   | 61  | NA    | 199 | 22.71     | Female | 66  | 28.04 |
| 42 | 10.01     | Female | 55  | 23.31 | 121 | 34.55     | Male   | 61  | NA    | 200 | 25.86     | Male   | 66  | 24.17 |
| 43 | 34.62     | Female | 55  | 22.98 | 122 | 29.85     | Male   | 61  | 20.57 | 201 | 33.16     | Male   | 66  | 28.20 |
| 44 | 34.79     | Female | 55  | 24.82 | 123 | 27.32     | Male   | 61  | 25.16 | 202 | 25.29     | Male   | 67  | NA    |
| 45 | 32.78     | Female | 55  | 38.03 | 124 | 30.69     | Male   | 61  | 28.40 | 203 | 32.87     | Male   | 67  | NA    |
| 46 | 27.09     | Female | 55  | 29.73 | 125 | 32.79     | Female | 61  | 29.44 | 204 | 23.66     | Male   | 67  | NA    |
| 47 | 34.34     | Male   | 56  | NA    | 126 | 36.75     | Female | 61  | 31.83 | 205 | 27.26     | Male   | 67  | NA    |
| 48 | 29.05     | Male   | 56  | NA    | 127 | 39.57     | Female | 61  | 33.98 | 206 | 25.14     | Male   | 67  | NA    |
| 49 | 38.38     | Male   | 56  | NA    | 128 | 32.63     | Female | 61  | 44.92 | 207 | 30.53     | Male   | 67  | 21.10 |
| 50 | 43.83     | Female | 56  | 41.62 | 129 | 35.71     | Female | 61  | 29.00 | 208 | 40.01     | Male   | 67  | 28.28 |
| 51 | 33.25     | Female | 56  | 28.00 | 130 | 31.42     | Male   | 61  | 25.18 | 209 | 29.97     | Male   | 67  | 32.66 |
| 52 | 36.06     | Female | 56  | 34.12 | 131 | 31.39     | Male   | 62  | NA    | 210 | 38.25     | Female | 67  | 27.80 |
| 53 | 35.99     | Female | 56  | 34.72 | 132 | 28.85     | Male   | 62  | NA    | 211 | 28.67     | Female | 67  | 22.83 |
| 54 | 39.41     | Female | 56  | 30.30 | 133 | 27.98     | Male   | 62  | NA    | 212 | 19.83     | Female | 67  | 22.42 |
| 55 | 29.93     | Female | 56  | 34.84 | 134 | 37.62     | Male   | 62  | NA    | 213 | 30.64     | Female | 67  | 27.72 |
| 56 | 28.98     | Female | 56  | 25.17 | 135 | 27.8      | Male   | 62  | NA    | 214 | 23.34     | Male   | 68  | NA    |
| 57 | 28.19     | Female | 56  | 32.08 | 136 | 42.07     | Male   | 62  | NA    | 215 | 27.37     | Male   | 68  | NA    |
| 58 | 39.03     | Female | 56  | 42.81 | 137 | 29.64     | Male   | 62  | NA    | 216 | 14.37     | Male   | 68  | NA    |
| 59 | 40.5      | Female | 56  | 36.73 | 138 | 27.08     | Male   | 62  | 28.33 | 217 | 24.5      | Male   | 68  | NA    |
| 60 | 9.48      | Female | 56  | 31.14 | 139 | 48.81     | Female | 62  | 25.65 | 218 | 26.09     | Male   | 68  | NA    |
| 61 | 25.98     | Male   | 57  | NA    | 140 | 42.53     | Female | 62  | 22.41 | 219 | 33.82     | Female | 68  | 29.78 |
| 62 | 22.09     | Male   | 57  | NA    | 141 | 22.14     | Female | 62  | 25.09 | 220 | 41.53     | Female | 68  | 23.01 |
| 63 | 32.56     | Male   | 57  | NA    | 142 | 37.05     | Female | 62  | 21.35 | 221 | 24.98     | Male   | 68  | 25.16 |
| 64 | 39.63     | Female | 57  | 21.26 | 143 | 48.8      | Female | 62  | 36.61 | 222 | 26.22     | Male   | 68  | 27.77 |
| 65 | 32.38     | Female | 57  | 56.92 | 144 | 40.16     | Female | 62  | 35.49 | 223 | 26.8      | Female | 68  | 28.67 |
| 66 | 29.51     | Female | 57  | 31.04 | 145 | 23.08     | Female | 62  | 28.46 | 224 | 26.02     | Female | 68  | 34.38 |
| 67 | 52.04     | Female | 57  | 44.44 | 146 | 41.25     | Female | 62  | 33.98 | 225 | 26.23     | Male   | 69  | NA    |
| 68 | 22.7      | Female | 57  | 37.83 | 147 | 29.26     | Female | 62  | 41.34 | 226 | 20.58     | Male   | 69  | NA    |
| 69 | 36.68     | Female | 57  | 29.38 | 148 | 41.72     | Female | 62  | 35.61 | 227 | 22.17     | Male   | 69  | NA    |
| 70 | 8.9       | Male   | 57  | 23.53 | 149 | 34.12     | Female | 62  | 34.19 | 228 | 29.31     | Male   | 69  | NA    |
| 71 | 27.85     | Male   | 58  | NA    | 150 | 18.88     | Male   | 62  | 24.80 | 229 | 37.08     | Male   | 69  | NA    |
| 72 | 28.83     | Male   | 58  | NA    | 151 | 40.1      | Male   | 62  | 30.85 | 230 | 27.6      | Female | 69  | 27.28 |
| 73 | 23.64     | Male   | 58  | NA    | 152 | 26.01     | Male   | 63  | NA    | 231 | 44.85     | Female | 69  | 27.20 |
| 74 | 33.09     | Male   | 58  | 23.94 | 153 | 31.54     | Male   | 63  | NA    | 232 | 37.07     | Female | 70  | 29.16 |
| 75 | 43.55     | Female | 58  | 42.44 | 154 | 40.84     | Male   | 63  | NA    | 233 | 41.69     | Female | 70  | 32.65 |
| 76 | 32.27     | Female | 58  | 29.27 | 155 | 30.07     | Male   | 63  | 20.99 |     |           |        |     |       |
| 77 | 35.56     | Female | 58  | 28.94 | 156 | 41.9      | Female | 63  | 19.84 |     |           |        |     |       |
| 78 | 20.92     | Female | 58  | 48.58 | 157 | 34.81     | Female | 63  | 25.32 |     |           |        |     |       |
| 79 | 33.88     | Female | 58  | 28.55 | 158 | 40.67     | Female | 63  | 28.57 |     |           |        |     |       |

Table S4. Methylation levels of the T2DM patients presented in figure 4.

| #  | Meth. (%) | Gender | Age | BMI   | #   | Meth. (%) | Gender | Age | BMI   | #   | Meth. (%) | Gender | Age | BMI   |
|----|-----------|--------|-----|-------|-----|-----------|--------|-----|-------|-----|-----------|--------|-----|-------|
| 1  | 37.48     | Female | 43  | 23.19 | 80  | 26.91     | Male   | 59  | 23.66 | 159 | 35.03     | Female | 66  | 28.44 |
| 2  | 19.96     | Female | 43  | 26.22 | 81  | 29.6      | Male   | 59  | 28.41 | 160 | 20.88     | Male   | 67  | 24.69 |
| 3  | 25.07     | Male   | 45  | 31.96 | 82  | 26        | Male   | 59  | 37.32 | 161 | 14.66     | Male   | 67  | 25.85 |
| 4  | 20.83     | Male   | 45  | 28.36 | 83  | 25.97     | Male   | 59  | 28.62 | 162 | 28.88     | Male   | 67  | 23.53 |
| 5  | 36.95     | Male   | 45  | 28.81 | 84  | 33.36     | Female | 59  | 24.34 | 163 | 20.25     | Female | 67  | 37.29 |
| 6  | 25.53     | Male   | 46  | 20.88 | 85  | 42.31     | Female | 59  | 37.44 | 164 | 21.13     | Female | 67  | 29.00 |
| 7  | 47.79     | Male   | 46  | 37.04 | 86  | 35.24     | Female | 59  | 36.92 | 165 | 28.34     | Female | 67  | 32.35 |
| 8  | 27.79     | Male   | 46  | 28.73 | 87  | 28.98     | Female | 59  | 32.43 | 166 | 28.72     | Female | 67  | 33.15 |
| 9  | 26.83     | Female | 46  | 36.00 | 88  | 34.98     | Female | 59  | 28.34 | 167 | 28.48     | Female | 67  | 32.47 |
| 10 | 24.16     | Female | 46  | 32.99 | 89  | 32.17     | Male   | 60  | 28.72 | 168 | 20.04     | Female | 67  | 35.34 |
| 11 | 24.87     | Female | 47  | 25.01 | 90  | 27.07     | Male   | 60  | 24.91 | 169 | 29.57     | Female | 67  | 33.43 |
| 12 | 27.47     | Male   | 48  | 26.99 | 91  | 25.83     | Male   | 60  | 22.34 | 170 | 27.74     | Female | 67  | 32.39 |
| 13 | 24.1      | Male   | 49  | 32.41 | 92  | 16.22     | Male   | 60  | 27.64 | 171 | 23.55     | Male   | 68  | 22.41 |
| 14 | 20.36     | Male   | 49  | 20.98 | 93  | 24.19     | Female | 60  | 33.20 | 172 | 12.51     | Male   | 68  | 24.00 |
| 15 | 25.05     | Male   | 49  | 28.37 | 94  | 28.02     | Female | 60  | 33.59 | 173 | 22.8      | Male   | 68  | 31.95 |
| 16 | 32.66     | Female | 49  | 37.10 | 95  | 33.13     | Female | 60  | 31.25 | 174 | 21.73     | Male   | 68  | 32.00 |
| 17 | 20.24     | Male   | 50  | 24.73 | 96  | 15.53     | Male   | 61  | 23.62 | 175 | 31.38     | Male   | 68  | 31.35 |
| 18 | 28.35     | Male   | 50  | 28.31 | 97  | 23.17     | Male   | 61  | 24.82 | 176 | 25.68     | Female | 68  | 28.04 |
| 19 | 31.1      | Male   | 50  | 32.77 | 98  | 24.79     | Female | 61  | 21.76 | 177 | 28.39     | Female | 68  | 28.13 |
| 20 | 21.57     | Female | 50  | 33.59 | 99  | 28.85     | Female | 61  | 33.39 | 178 | 27.46     | Female | 68  | 35.30 |
| 21 | 27.29     | Male   | 51  | 28.60 | 100 | 21.62     | Female | 61  | 34.48 | 179 | 37.75     | Female | 68  | 20.76 |
| 22 | 25.81     | Male   | 51  | 27.77 | 101 | 21.5      | Female | 61  | 30.80 | 180 | 30.62     | Female | 68  | 28.35 |
| 23 | 31.04     | Male   | 52  | 32.45 | 102 | 27.68     | Male   | 62  | 24.45 | 181 | 41.73     | Female | 68  | 36.89 |
| 24 | 35.27     | Female | 52  | 36.00 | 103 | 36.68     | Male   | 62  | 21.80 | 182 | 49.3      | Female | 68  | 24.61 |
| 25 | 30.79     | Female | 52  | 24.52 | 104 | 20.09     | Male   | 62  | 22.34 | 183 | 33.23     | Female | 68  | 25.91 |
| 26 | 26.99     | Male   | 53  | 32.24 | 105 | 39.06     | Female | 62  | 37.46 | 184 | 16.37     | Male   | 69  | 21.91 |
| 27 | 18.97     | Male   | 53  | 32.37 | 106 | 30.18     | Female | 62  | 21.64 | 185 | 29.53     | Male   | 69  | 33.02 |
| 28 | 20.12     | Male   | 53  | 27.72 | 107 | 33.3      | Female | 62  | 28.30 | 186 | 29.07     | Male   | 69  | 28.33 |
| 29 | 30.6      | Male   | 53  | 33.31 | 108 | 31.44     | Female | 62  | 37.72 | 187 | 28.22     | Male   | 69  | 23.88 |
| 30 | 31.95     | Female | 53  | 37.28 | 109 | 38.19     | Female | 62  | 32.42 | 188 | 18.92     | Female | 69  | 36.89 |
| 31 | 28.64     | Female | 53  | 24.09 | 110 | 43.88     | Female | 62  | 30.08 | 189 | 55.16     | Female | 69  | 28.13 |
| 32 | 22.68     | Female | 53  | 36.74 | 111 | 27.99     | Male   | 63  | 19.15 | 190 | 27.77     | Female | 69  | 28.80 |
| 33 | 33.68     | Female | 53  | 28.74 | 112 | 22.29     | Male   | 63  | 24.34 | 191 | 45.51     | Female | 69  | 28.37 |
| 34 | 22.18     | Male   | 54  | 32.28 | 113 | 23.56     | Male   | 63  | 32.65 | 192 | 37.73     | Female | 69  | 37.46 |
| 35 | 34.54     | Male   | 54  | 35.43 | 114 | 29.95     | Male   | 63  | 28.06 | 193 | 31.84     | Female | 69  | 25.97 |
| 36 | 39.88     | Female | 54  | 28.04 | 115 | 24.98     | Male   | 63  | 37.52 | 194 | 22.8      | Male   | 70  | 37.02 |
| 37 | 28.05     | Female | 54  | 32.86 | 116 | 25.58     | Male   | 63  | 24.52 | 195 | 18.56     | Male   | 70  | 24.39 |
| 38 | 42.86     | Female | 54  | 28.19 | 117 | 28.11     | Male   | 63  | 30.82 | 196 | 16.79     | Male   | 70  | 24.34 |
| 39 | 31.82     | Female | 54  | 36.13 | 118 | 36.69     | Female | 63  | 33.59 | 197 | 22.63     | Male   | 70  | 22.50 |
| 40 | 28.71     | Female | 54  | 36.72 | 119 | 36.67     | Female | 63  | 22.43 | 198 | 38.99     | Female | 70  | 35.88 |
| 41 | 20.54     | Female | 54  | 28.73 | 120 | 23.95     | Female | 63  | 28.33 |     |           |        |     |       |
| 42 | 34.89     | Female | 54  | 23.38 | 121 | 32.1      | Female | 63  | 28.70 |     |           |        |     |       |
| 43 | 27.91     | Male   | 55  | 35.59 | 122 | 22.35     | Male   | 64  | 24.24 |     |           |        |     |       |
| 44 | 35.42     | Male   | 55  | 21.30 | 123 | 28.63     | Male   | 64  | 35.38 |     |           |        |     |       |
| 45 | 23.52     | Male   | 55  | 24.82 | 124 | 30.34     | Male   | 64  | 36.44 |     |           |        |     |       |
| 46 | 27.73     | Male   | 55  | 28.41 | 125 | 23.22     | Male   | 64  | 32.32 |     |           |        |     |       |
| 47 | 22.7      | Female | 55  | 33.46 | 126 | 26.89     | Male   | 64  | 22.84 |     |           |        |     |       |
| 48 | 48.77     | Female | 55  | 20.89 | 127 | 32.14     | Male   | 64  | 27.78 |     |           |        |     |       |
| 49 | 19.61     | Female | 55  | 23.80 | 128 | 18.02     | Female | 64  | 21.64 |     |           |        |     |       |
| 50 | 29.55     | Female | 55  | 37.47 | 129 | 29.61     | Female | 64  | 22.66 |     |           |        |     |       |
| 51 | 38.6      | Female | 55  | 32.44 | 130 | 29.96     | Female | 64  | 24.35 |     |           |        |     |       |
| 52 | 32.22     | Female | 55  | 32.69 | 131 | 27.14     | Female | 64  | 28.48 |     |           |        |     |       |
| 53 | 29.35     | Male   | 56  | 32.28 | 132 | 28.47     | Female | 64  | 25.78 |     |           |        |     |       |
| 54 | 16.55     | Male   | 56  | 25.73 | 133 | 28.07     | Female | 64  | 30.41 |     |           |        |     |       |
| 55 | 31.97     | Female | 56  | 32.65 | 134 | 28.79     | Male   | 65  | 22.59 |     |           |        |     |       |
| 56 | 40.93     | Female | 56  | 28.28 | 135 | 28.51     | Male   | 65  | 32.39 |     |           |        |     |       |
| 57 | 29.57     | Female | 56  | 28.52 | 136 | 25.08     | Male   | 65  | 23.94 |     |           |        |     |       |
| 58 | 26.58     | Male   | 57  | 23.60 | 137 | 34.15     | Male   | 65  | 28.08 |     |           |        |     |       |
| 59 | 34.3      | Male   | 57  | 25.50 | 138 | 33.46     | Male   | 65  | 37.56 |     |           |        |     |       |
| 60 | 23.74     | Male   | 57  | 32.79 | 139 | 23.97     | Male   | 65  | 28.37 |     |           |        |     |       |
| 61 | 24.21     | Male   | 57  | 28.68 | 140 | 29.22     | Male   | 65  | 29.05 |     |           |        |     |       |
| 62 | 33.45     | Male   | 57  | 28.08 | 141 | 32.1      | Female | 65  | 24.31 |     |           |        |     |       |
| 63 | 22.63     | Male   | 57  | 32.95 | 142 | 26.6      | Female | 65  | 25.04 |     |           |        |     |       |
| 64 | 19.21     | Male   | 57  | 24.62 | 143 | 30.42     | Female | 65  | 32.69 |     |           |        |     |       |
| 65 | 23.98     | Male   | 57  | 27.47 | 144 | 36.36     | Male   | 66  | 25.16 |     |           |        |     |       |
| 66 | 30.1      | Male   | 57  | 30.32 | 145 | 28.32     | Male   | 66  | 28.09 |     |           |        |     |       |
| 67 | 45.12     | Female | 57  | 22.31 | 146 | 31.86     | Male   | 66  | 21.05 |     |           |        |     |       |
| 68 | 40.08     | Female | 57  | 28.91 | 147 | 14.8      | Male   | 66  | 22.98 |     |           |        |     |       |
| 69 | 18.88     | Female | 57  | 24.90 | 148 | 29.28     | Male   | 66  | 22.99 |     |           |        |     |       |
| 70 | 44.44     | Female | 57  | 22.66 | 149 | 19.15     | Male   | 66  | 23.88 |     |           |        |     |       |
| 71 | 24.28     | Male   | 58  | 28.73 | 150 | 28.7      | Male   | 66  | 32.08 |     |           |        |     |       |
| 72 | 24.03     | Male   | 58  | 25.26 | 151 | 21.78     | Male   | 66  | 29.04 |     |           |        |     |       |
| 73 | 35.83     | Male   | 58  | 23.41 | 152 | 22.54     | Male   | 66  | 33.73 |     |           |        |     |       |
| 74 | 32.91     | Female | 58  | 32.47 | 153 | 35.83     | Female | 66  | 28.65 |     |           |        |     |       |
| 75 | 26.47     | Female | 58  | 28.70 | 154 | 34.62     | Female | 66  | 20.94 |     |           |        |     |       |
| 76 | 38.74     | Female | 58  | 33.06 | 155 | 33.12     | Female | 66  | 35.55 |     |           |        |     |       |
| 77 | 38.82     | Female | 58  | 31.25 | 156 | 17.45     | Female | 66  | 24.13 |     |           |        |     |       |
| 78 | 17.64     | Female | 58  | 44.92 | 157 | 30.86     | Female | 66  | 22.77 |     |           |        |     |       |
| 79 | 19.69     | Female | 58  | 39.45 | 158 | 22.85     | Female | 66  | 33.46 |     |           |        |     |       |

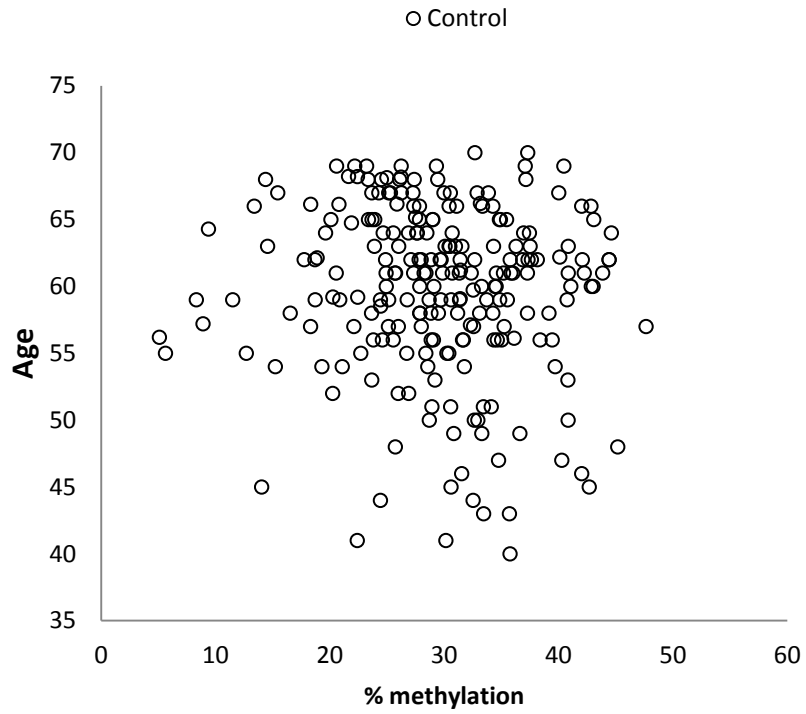

Figure S2. The ages of the 233 controls presented in figure 4, versus their methylation levels. No significant correlation ( $R^2 = 0.011$ ) appeared between methylation and age within the examined age range.



Table S5. Methylation levels, differential blood counts, and glucose levels of the control participants in the Jerusalem LRC longitudinal (cohort) study.

| #  | Meth. (%) | Gender | Age 30 |           |          |          |                 | Age 43     |                 |            |    |
|----|-----------|--------|--------|-----------|----------|----------|-----------------|------------|-----------------|------------|----|
|    |           |        | BMI    | Lymph (%) | Gran (%) | Mono (%) | Fasting Glucose | 2h Glucose | Fasting Glucose | 2h Glucose |    |
| 1  | 34.32     | Female | 33.83  | 30.6      |          |          |                 | 98         | 81              | 81         | 96 |
| 2  | 39.52     | Female | 21.68  | 32.7      | 65.4     | 1.9      | 82              | 114        | 82              | 121        |    |
| 3  | 38.01     | Female | 20.92  | 33.9      | 60.5     | 5.6      | 82              | 88         | 82              | 85         |    |
| 4  | 26.26     | Female | 21.83  | 25.6      | 67.4     | 7.0      | 91              | 85         | 83              | 93         |    |
| 5  | 40.40     | Female | 20.03  | 30.3      | NA       | NA       | 84              | 74         | 84              | 77         |    |
| 6  | 49.92     | Female | 22.47  | 43.3      | 49.9     | 6.8      | 97              | 91         | 86              | 123        |    |
| 7  | 51.39     | Male   | 22.56  | 46.9      | 45.5     | 7.6      | 88              | 78         | 86              | 75         |    |
| 8  | 21.69     | Male   | 21.43  | 16.9      | 76.2     | 6.9      | 96              | 96         | 86              | 68         |    |
| 9  | 42.24     | Female | 22.58  | 40.7      | 54.5     | 4.8      | 94              | 90         | 86              | 66         |    |
| 10 | 44.28     | Male   | 25.81  | 36.3      | 56.9     | 6.8      | 85              | 35         | 86              | 66         |    |
| 11 | 36.33     | Female | 23.85  | 38.2      | 54.1     | 7.7      | 84              | 108        | 87              | 132        |    |
| 12 | 39.83     | Female | 27.36  | 34.6      | 58.3     | 7.1      | 91              | 102        | 87              | 85         |    |
| 13 | 39.24     | Male   | 24.40  | 41.0      | 55.9     | 3.1      | 86              | 76         | 88              | 108        |    |
| 14 | 25.00     | Male   | 23.66  | 22.1      | 68.5     | 9.4      | 82              | 79         | 88              | 102        |    |
| 15 | 34.81     | Male   | 23.95  | 24.7      | 70.3     | 5.0      | 87              | 86         | 89              | 119        |    |
| 16 | 39.37     | Male   | 23.23  | 30.2      | 61.1     | 8.7      | 87              | 89         | 89              | 89         |    |
| 17 | 28.25     | Male   | 23.89  | 24.1      | 73.1     | 2.8      | 94              | 61         | 89              | 80         |    |
| 18 | 43.29     | Male   | 24.27  | 35.6      | 58.6     | 5.8      | 85              | 62         | 89              | 78         |    |
| 19 | 34.15     | Male   | 20.70  | 26.1      | 65.7     | 8.2      | 88              | 60         | 90              | 122        |    |
| 20 | 33.74     | Male   | 28.36  | 28.1      | 65.5     | 6.4      | 84              | 86         | 90              | 116        |    |
| 21 | 42.32     | Male   | 24.81  | 35.9      | 57.4     | 6.7      | 90              | 93         | 90              | 90         |    |
| 22 | 40.61     | Male   | 20.73  | 37.3      | 56.7     | 6.0      | 91              | 78         | 90              | 82         |    |
| 23 | 46.13     | Male   | 21.43  | 39.8      | 54.1     | 6.1      | 94              | 56         | 91              | 133        |    |
| 24 | 37.78     | Male   | 20.97  | 37.1      | 57.0     | 5.9      | 88              | 107        | 91              | 109        |    |
| 25 | 33.18     | Male   | 21.18  | 37.9      | 54.9     | 7.2      | 80              | 76         | 91              | 89         |    |
| 26 | 35.98     | Female | 23.91  | 25.9      | 69.9     | 4.2      | 95              | 99         | 92              | 120        |    |
| 27 | 39.55     | Male   | 21.55  | 40.7      | 50.0     | 9.3      | 96              | 81         | 92              | 102        |    |
| 28 | 36.10     | Male   | 29.27  | 30.2      | 62.8     | 7.0      | 98              | 90         | 92              | 86         |    |
| 29 | 46.95     | Male   | 20.04  | 49.2      | 43.8     | 7.0      | 89              | 87         | 92              | 76         |    |
| 30 | 39.76     | Male   | 25.02  | 30.9      | 57.8     | 11.3     | 82              | 56         | 93              | 94         |    |
| 31 | 51.86     | Female | 20.06  | 40.8      | 57.3     | 1.9      | 84              | 86         | 93              | 77         |    |
| 32 | 35.44     | Male   | 23.70  | 35.4      | 56.3     | 8.3      | 81              | 53         | 93              | 61         |    |
| 33 | 40.93     | Male   | 22.68  | 34.8      | 58.0     | 7.2      | 88              | 73         | 94              | 102        |    |
| 34 | 46.74     | Male   | 22.91  | 35.7      | 56.2     | 8.1      | 90              | 96         | 94              | 94         |    |
| 35 | 24.27     | Female | 22.45  | 25.4      | NA       | NA       | 89              | 77         | 95              | 127        |    |
| 36 | 30.52     | Male   | 24.15  | 23.9      | 71.8     | 4.3      | 91              | 132        | 95              | 122        |    |
| 37 | 44.05     | Male   | 25.52  | 47.1      | 50.2     | 2.7      | 99              | 108        | 95              | 113        |    |
| 38 | 44.34     | Male   | 22.87  | 29.4      | 62.6     | 8.0      | 97              | 38         | 95              | 110        |    |
| 39 | 37.30     | Female | 21.90  | 34.6      | 53.1     | 12.3     | 90              | 82         | 95              | 101        |    |
| 40 | 34.67     | Male   | 20.98  | 34.4      | 59.0     | 6.6      | 89              | 85         | 95              | 98         |    |
| 41 | 39.15     | Male   | 22.53  | 35.9      | 59.3     | 4.8      | 93              | 89         | 95              | 89         |    |
| 42 | 33.52     | Male   | 20.87  | 34.1      | 57.4     | 8.5      | 92              | 66         | 95              | 68         |    |
| 43 | 35.27     | Male   | 31.58  | 33.4      | 60.7     | 5.9      | 91              | 91         | 95              | 63         |    |
| 44 | 37.23     | Male   | 23.89  | 29.6      | 65.2     | 5.2      | 82              | 78         | 96              | NA         |    |
| 45 | 42.52     | Male   | 23.87  | 29.3      | 66.9     | 3.8      | 88              | 133        | 96              | 137        |    |
| 46 | 43.40     | Male   | 19.71  | 39.5      | NA       | NA       | 96              | 117        | 96              | 118        |    |
| 47 | 40.03     | Male   | 21.78  | 47.2      | 43.0     | 9.8      | 85              | 66         | 96              | 97         |    |
| 48 | 27.86     | Male   | 22.62  | 30.7      | 60.2     | 9.1      | 95              | 94         | 96              | 92         |    |
| 49 | 30.37     | Male   | 27.69  | 24.5      | 69.9     | 5.6      | 87              | 97         | 96              | 88         |    |
| 50 | 37.93     | Male   | 23.21  | 41.0      | 48.9     | 10.1     | 93              | 84         | 96              | 79         |    |
| 51 | 23.95     | Male   | 23.06  | 24.9      | 67.6     | 7.5      | 87              | 76         | 96              | 75         |    |
| 52 | 34.56     | Male   | 27.34  | 30.7      | 67.6     | 1.7      | 84              | 70         | 97              | 136        |    |
| 53 | 43.03     | Male   | 24.25  | 37.0      | 57.1     | 5.9      | 97              | 98         | 97              | 97         |    |
| 54 | 34.06     | Male   | 29.98  | 32.1      | 60.9     | 7.0      | 80              | 57         | 98              | 111        |    |
| 55 | 34.35     | Male   | 24.30  | 21.3      | 72.8     | 5.9      | 99              | 107        | 98              | 91         |    |
| 56 | 45.05     | Male   | 24.14  | 38.5      | 52.4     | 9.1      | 97              | 76         | 98              | 91         |    |
| 57 | 43.25     | Male   | 31.59  | 38.7      | 54.9     | 6.4      | 99              | 70         | 98              | 90         |    |
| 58 | 34.58     | Male   | 24.05  | 24.8      | 70.7     | 4.5      | 95              | 98         | 98              | 87         |    |
| 59 | 48.86     | Male   | 19.18  | 49.4      | 46.0     | 4.6      | 93              | 102        | 98              | 86         |    |
| 60 | 39.90     | Male   | 27.42  | 25.8      | 67.0     | 7.2      | 97              | 67         | 98              | 64         |    |
| 61 | 26.25     | Female | 23.21  | 28.6      | 64.2     | 7.2      | 96              | 98         | 99              | 107        |    |
| 62 | 33.40     | Male   | 23.19  | 29.7      | 65.1     | 5.2      | 95              | 97         | 99              | 106        |    |
| 63 | 44.53     | Female | 27.18  | 28.8      | 67.5     | 3.7      | 93              | 95         | 99              | 74         |    |
| 64 | 48.58     | Female | 25.09  | 37.3      | 55.7     | 7.0      | 81              | 79         | 99              | 57         |    |

Table S6. Methylation levels, differential blood counts, and glucose levels of the incidence cases of IGM/T2DM participants in the Jerusalem LRC longitudinal (cohort) study.

| #  | Meth. (%) | Gender | Age 30 |           |          |          |                 |            | Age 43          |            |
|----|-----------|--------|--------|-----------|----------|----------|-----------------|------------|-----------------|------------|
|    |           |        | BMI    | Lymph (%) | Gran (%) | Mono (%) | Fasting Glucose | 2h Glucose | Fasting Glucose | 2h Glucose |
| 1  | 46.56     | Female | 21.73  | 41.9      | 53.4     | 4.7      | 82              | 80         | 81              | 151        |
| 2  | 31.34     | Female | 22.19  | 22.9      | NA       | NA       | 48              | 82         | 90              | 152        |
| 3  | 29.70     | Male   | 26.25  | 29.7      | 67.2     | 3.1      | 85              | 93         | 92              | 152        |
| 4  | 25.18     | Male   | 33.54  | 26.3      | NA       | NA       | 98              | 126        | 93              | 152        |
| 5  | 30.58     | Male   | 26.79  | 30.1      | 63.2     | 6.7      | 88              | 95         | 94              | 148        |
| 6  | 42.50     | Male   | 29.07  | 24.6      | 69.8     | 5.6      | 95              | 89         | 94              | 143        |
| 7  | 41.45     | Female | 20.19  | 37.4      | 56.4     | 6.2      | 97              | 93         | 94              | 141        |
| 8  | 35.74     | Male   | 21.09  | 31.3      | NA       | NA       | 94              | 80         | 95              | 187        |
| 9  | 36.40     | Male   | 24.91  | 30.6      | 62.4     | 7.0      | 79              | 95         | 96              | 197        |
| 10 | 34.36     | Female | 22.30  | 35.2      | 59.4     | 5.4      | 82              | 69         | 96              | 143        |
| 11 | 28.52     | Female | 19.69  | 23.7      | 66.7     | 9.6      | 77              | 76         | 97              | 163        |
| 12 | 41.86     | Male   | 30.69  | 38.9      | 54.5     | 6.6      | 85              | 87         | 97              | 157        |
| 13 | 33.39     | Male   | 21.40  | 31.5      | 61.4     | 7.1      | 93              | 88         | 97              | 143        |
| 14 | 29.05     | Male   | 26.50  | 27.8      | 67.2     | 5.0      | 87              | 112        | 98              | 169        |
| 15 | 39.54     | Female | 23.65  | 27.9      | 65.0     | 7.1      | 95              | 98         | 100             | 147        |
| 16 | 44.56     | Male   | 18.33  | 39.3      | 52.1     | 8.6      | 91              | 88         | 101             | 157        |
| 17 | 33.35     | Male   | 25.81  | 34.1      | 58.6     | 7.3      | 85              | 59         | 102             | 148        |
| 18 | 24.57     | Male   | 25.50  | 39.7      | 52.3     | 8.0      | 97              | 66         | 104             | 151        |
| 19 | 35.64     | Male   | 26.20  | 29.5      | NA       | NA       | 93              | 121        | 104             | 141        |
| 20 | 36.23     | Male   | 28.93  | 27.6      | 64.4     | 8.0      | 86              | 120        | 104             | 148        |
| 21 | 41.51     | Female | 32.17  | 35.7      | 55.4     | 8.9      | 90              | 117        | 105             | 212        |
| 22 | 36.79     | Male   | 20.60  | 28.5      | 66.1     | 5.4      | 90              | 74         | 106             | 151        |
| 23 | 27.53     | Male   | 22.25  | 25.8      | 64.6     | 9.6      | 96              | 113        | 107             | 141        |
| 24 | 38.21     | Male   | 31.43  | 36.1      | 56.9     | 7.0      | 93              | 113        | 107             | 248        |
| 25 | 48.17     | Male   | 27.11  | 40.9      | 53.4     | 5.7      | 94              | 113        | 109             | 158        |
| 26 | 27.47     | Female | 25.82  | 31.5      | 65.3     | 3.2      | 84              | 81         | 110             | 74         |
| 27 | 28.02     | Male   | 23.34  | 19.0      | 74.0     | 7.0      | 88              | 91         | 110             | 82         |
| 28 | 29.99     | Female | 23.58  | 29.6      | 67.7     | 2.7      | 89              | 109        | 110             | 103        |
| 29 | 38.48     | Male   | 22.91  | 34.7      | 57.2     | 8.1      | 94              | 117        | 110             | 88         |
| 30 | 45.24     | Male   | 26.74  | 42.2      | 51.8     | 6.0      | 97              | 93         | 110             | 173        |
| 31 | 32.91     | Male   | 23.90  | 30.5      | 66.9     | 2.6      | 94              | 92         | 111             | 105        |
| 32 | 34.54     | Male   | 20.26  | 26.2      | 70.6     | 3.2      | 98              | 72         | 111             | 92         |
| 33 | 33.25     | Male   | 29.72  | 34.4      | NA       | NA       | 93              | 92         | 112             | 142        |
| 34 | 33.32     | Male   | 30.13  | 29.2      | 64.1     | NA       | 95              | 137        | 112             | 106        |
| 35 | 36.94     | Female | 25.82  | 34.7      | 59.7     | 5.6      | 84              | 76         | 112             | 139        |
| 36 | 37.55     | Male   | 25.22  | 36.1      | 55.9     | 8.0      | 93              | 74         | 112             | 95         |
| 37 | 39.84     | Male   | 32.17  | 41.0      | 50.9     | 8.1      | 94              | 106        | 112             | 147        |
| 38 | 40.04     | Male   | 22.73  | 34.4      | 56.2     | 9.4      | 93              | 92         | 112             | 112        |
| 39 | 42.72     | Male   | 25.55  | 41.5      | 55.4     | 3.1      | 99              | 81         | 112             | 101        |
| 40 | 24.50     | Male   | 27.77  | 28.4      | 64.3     | 7.3      | 94              | 85         | 113             | 99         |
| 41 | 32.28     | Male   | 25.61  | 30.7      | NA       | NA       | 84              | 98         | 113             | 102        |
| 42 | 38.94     | Male   | 22.68  | 36.2      | 55.8     | 8.0      | 97              | 68         | 113             | 104        |
| 43 | 26.54     | Female | 22.39  | 26.9      | 66.6     | 6.5      | 95              | 124        | 114             | NA         |
| 44 | 30.81     | Female | 19.41  | 31.4      | 62.0     | 6.6      | 89              | 88         | 114             | 142        |
| 45 | 38.00     | Male   | 24.74  | 35.4      | 56.4     | 8.2      | 96              | 70         | 114             | 73         |
| 46 | 39.89     | Male   | 25.23  | 44.9      | 44.7     | 10.4     | 98              | 90         | 114             | 60         |
| 47 | 31.14     | Male   | 27.84  | 32.8      | 57.6     | 9.6      | 98              | 118        | 115             | 174        |
| 48 | 35.54     | Male   | 28.63  | 33.7      | 63.1     | 3.2      | 98              | 82         | 115             | 115        |
| 49 | 44.81     | Male   | 16.62  | 39.0      | NA       | NA       | 89              | 58         | 115             | 100        |
| 50 | 27.82     | Male   | 25.28  | 26.5      | 66.7     | 6.8      | 99              | 91         | 117             | 113        |
| 51 | 35.96     | Male   | 33.15  | 29.7      | 65.7     | 4.6      | 92              | 82         | 117             | 92         |
| 52 | 37.13     | Male   | 27.65  | 41.5      | NA       | NA       | 93              | 120        | 119             | 119        |
| 53 | 39.69     | Female | 30.43  | 32.3      | 59.7     | 8.0      | 99              | 109        | 124             | 144        |
| 54 | 46.32     | Male   | 34.61  | 45.0      | 50.1     | 4.9      | 97              | 111        | 125             | 201        |
| 55 | 24.83     | Male   | 28.73  | 37.2      | 54.4     | 8.4      | 77              | 78         | 126             | 171        |
| 56 | 39.09     | Male   | 32.31  | 29.3      | 62.9     | 7.8      | 95              | 108        | 132             | 294        |
| 57 | 49.28     | Female | 39.92  | 39.9      | 53.9     | 6.2      | 92              | 96         | 135             | NA         |
| 58 | 38.03     | Male   | 26.12  | 27.6      | 64.4     | 8.0      | 97              | 60         | 363             | NA         |

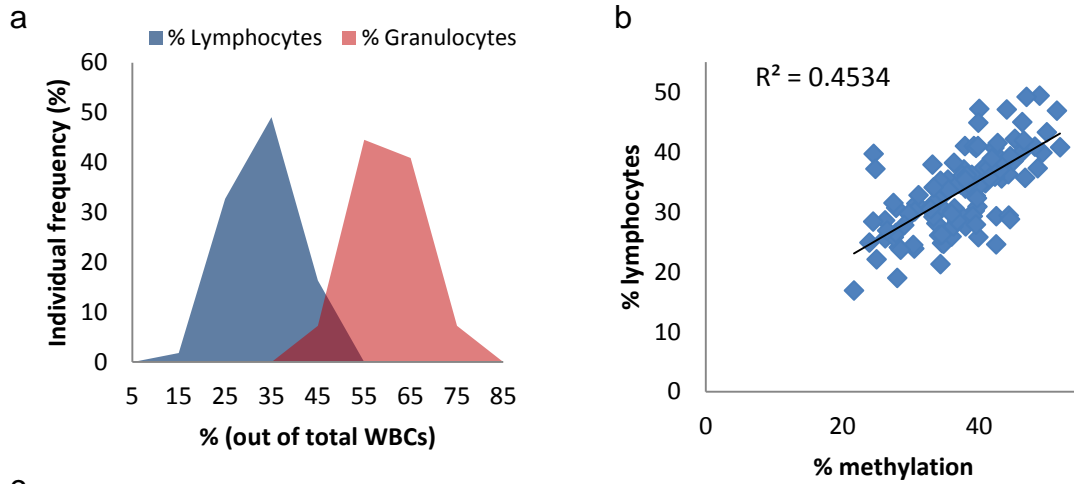

**c**

|                     | Avg. % |       |       |              | Predicted methylation (%) |       |       | Bound (for all) |       |
|---------------------|--------|-------|-------|--------------|---------------------------|-------|-------|-----------------|-------|
|                     | All    | Ctrl  | Case  | SD (for all) | All                       | Ctrl  | Case  | Lower           | Upper |
| <b>Lymphocytes</b>  | 33.36  | 33.59 | 33.10 | 6.63         | 83.67                     | 84.50 | 81.24 | 73.39           | 93.96 |
| <b>Granulocytes</b> | 60.11  | 59.96 | 60.29 | 7.06         | 15.21                     | 16.34 | 15.06 | 9.68            | 20.96 |
| <b>Monocytes</b>    | 6.53   | 6.46  | 6.62  | 2.12         | 0                         | 0     | 0     | 0               | 43.45 |

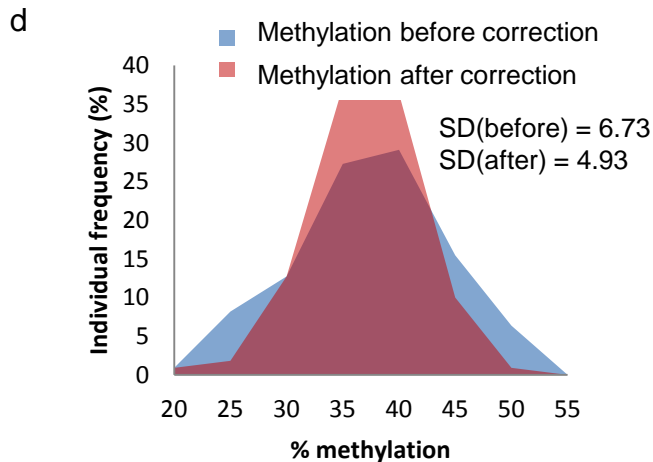

Figure S3. **Lineage-specific methylation levels in blood.** Analyses of 110 individuals from the Jerusalem Lipid Research Clinic (longitudinal) study for which we obtained full baseline blood counts and methylation levels. **a.** Distribution of lymphocyte and granulocyte percentages (out of total white blood cells) among the 110 participants. **b.** Correlation between the percentage of lymphocytes and methylation levels. **c.** Prediction of lineage-specific methylation levels, based on the correlation presented in panel b (methods). **d.** Adjustment of methylation levels for blood counts decreases the between-individual variance by 26.7%.

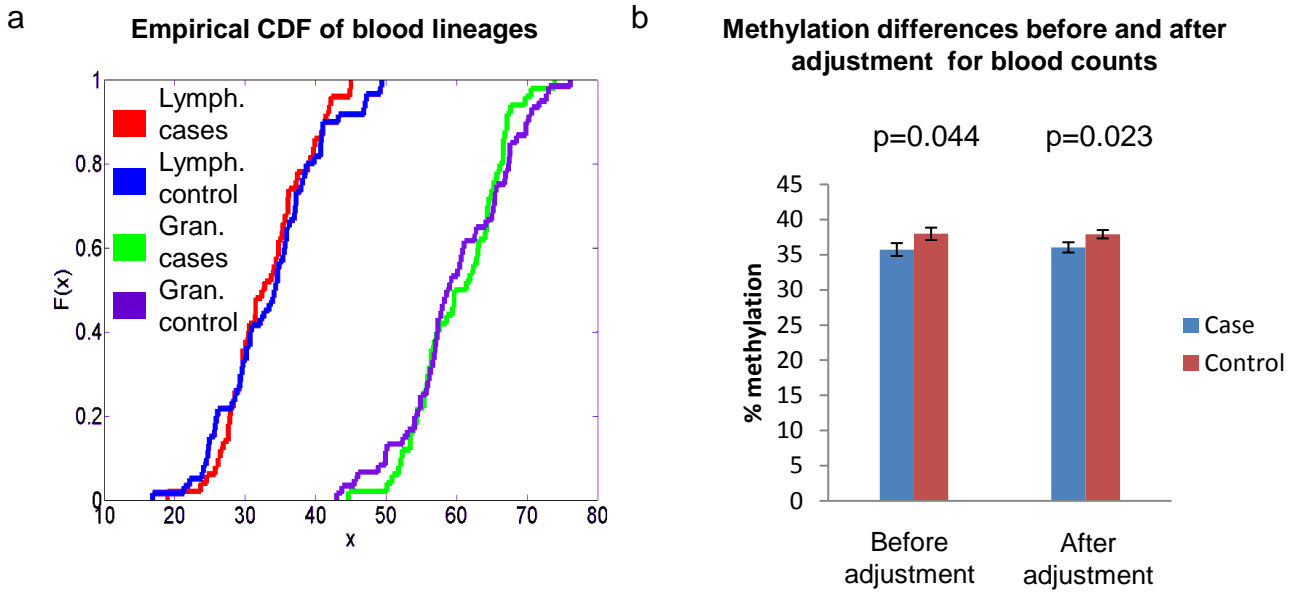

**Figure S4. Differential methylation between blood cell lineages did not confound the association of baseline methylation with incidence of IGM/T2DM.** Analyses of 110 individuals from the Jerusalem Lipid Research Clinic (longitudinal) study for which we obtained baseline blood counts of lymphocytes, granulocytes and monocytes and methylation levels. **a.** Empirical cumulative distribution functions (CDF) shows no significant differences (K-S tests  $>0.5$ ) in blood counts between 50 cases (who later developed impaired glucose metabolism) and 60 healthy subjects. **b.** Methylation differences between cases and control before and after adjustment for differential blood counts. The data show that the case-control methylation difference is somewhat smaller following adjustment to blood counts, but, due to the reduced between-individual variance as presented in Figure S3d, cases and controls are even more significantly distinguished following the adjustment. Note that the adjusted p-value differs slightly from the one presented in Figure 6: Figure 6 refers to 122 individuals with lymphocyte counts, while the data presented here refer to the 110 individuals out of the 122 for which we also obtained granulocytes and monocytes counts.

**Note S1.** As many cell types exhibit lineage-specific methylation levels, control for a possible confounding effect of cell type composition in the examined tissue on case-control methylation differences should be undertaken (large databases consisting of DNA samples from a singular cell type are virtually unavailable). In the case of the *FTO* methylation site (Figure 3a) we indeed observed large methylation differences between the two dominant white blood cell (WBC) lineages, lymphocytes and granulocytes (Figure S3a-c). Differences in the counts of these two cell types between healthy subjects explained 26.7% of the inter-individual methylation variance in whole blood samples (figure S3d) (other blood lineages also showed specific methylation levels, but their contribution is very limited since they account for only a small fraction of the blood cell population). However, adjustment for this effect did not weaken the association of baseline methylation levels with the incidence of IGM/DM (Figure S4b).

We also searched the literature for reports on differences in blood counts between T2DM patients and normal individuals. While T2DM was associated with higher WBC counts relative to controls (2-3), significant differences in lymphocytes to granulocytes ratio were not reported. We have further contacted the author of a recent large meta-analysis on this issue (4) and confirmed that indeed no such differences were observed (5). Thus, differences in the differential blood counts between cases and non-cases, both in our cohort as well as in many other large cohorts, cannot explain the observed T2DM hypomethylation finding.

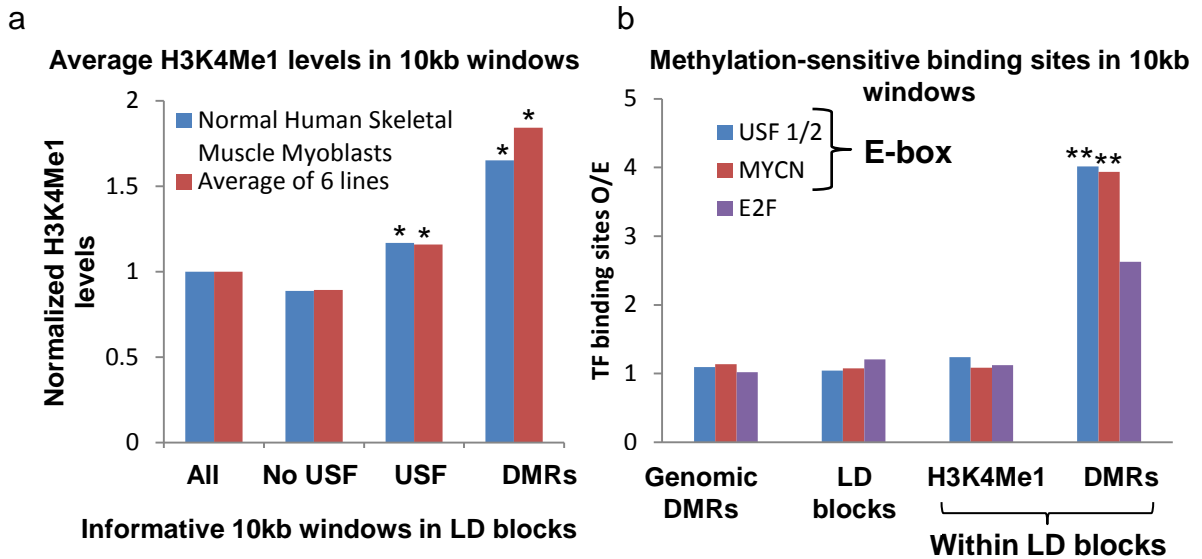

Figure S5. Same analyses as in figure 7 c-d, but for stringent DMRs rather than for all DMRs. **a.** Average levels of H3K4Me1 marks in 10kb windows along the T2DM LD blocks, in windows without or with USF1/2 binding sites, and in DMRs. Asterisks denote significant enrichment ( $P < 0.05$ ). **b.** The ratio of observed/expected numbers of binding sites (expectation is based on the frequency across the genome) in all genomic DMRs, in LD block windows, in LD block windows enriched with H3K4Me1 marks, and in LD block DMRs. Double asterisks denote significant enrichment ( $P < 0.01$ ).

The only major difference between the results of this analysis and the results of the analysis presented in figure 7 was that among stringent DMRs, binding sites for the E2F transcription factor were not significantly enriched ( $p = 0.099$ ). This may be due to the smaller number of stringent DMRs compared to the number of all DMRs. USF1/2 were the only methylation-sensitive transcription factors that showed enrichment at  $p$ -values  $< 0.001$  in both regular and stringent DMRs.

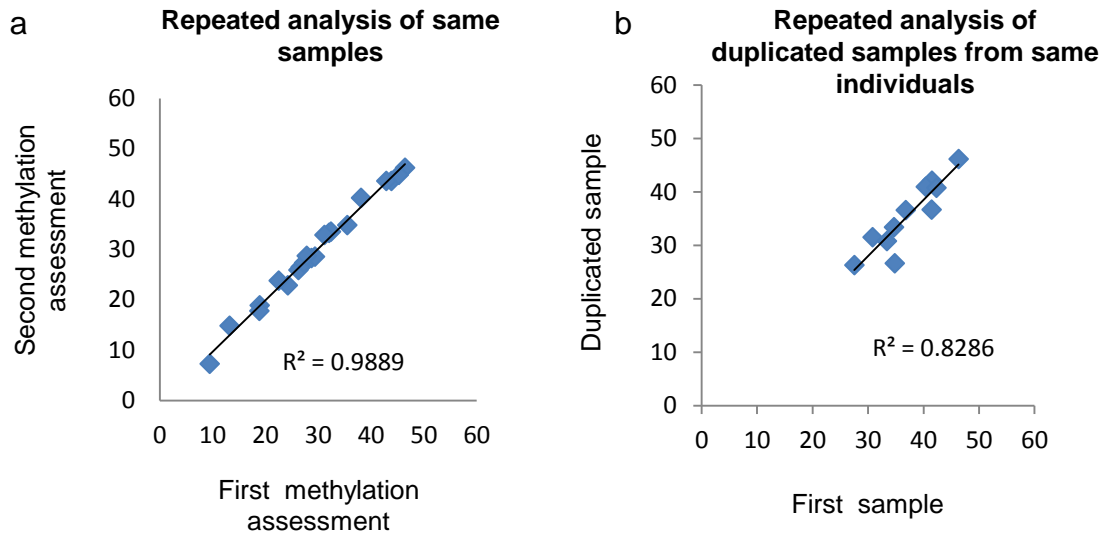

Figure S6. **Assay reproducibility and cohort quality.** **a.** Replicated pyrosequencing analyses of 21 samples. The average difference between replicates was 0.89% and the correlation between the sets was  $R^2=0.99$ . **b.** Pyrosequencing analyses of duplicated samples obtained from 11 randomly-selected participants out of the 122 participants in the longitudinal study. All samples were treated together through all the analysis stages.

### Supplementary references:

1. Straussman R. et al. (2009) Developmental programming of CpG island methylation profiles in the human genome. *Nat Struct Mol Biol.* **16**, 564-571.
2. Vozarova, B. et al. (2002) High white blood cell count is associated with a worsening of insulin sensitivity and predicts the development of type 2 diabetes. *Diabetes* **51**, 455-461.
3. Tsai, J. C. et al. (2007) Association of peripheral total and differential leukocyte counts with metabolic syndrome and risk of ischemic cardiovascular diseases in patients with type 2 diabetes mellitus. *Diabetes Metab Res Rev* **23**, 111-118.
4. Gkrania-Klotsas, E. et al. (2010) Differential white blood cell count and type 2 diabetes: systematic review and meta-analysis of cross-sectional and prospective studies. *PLoS One* **5**, e13405.
5. E. Gkrania-Klotsas, personal communication.
